# Supplementary material for: The Molecular Organization of Human cGMP Specific Phosphodiesterase 6 (PDE6): Structural Implications of Somatic Mutations in Cancer and Retinitis Pigmentosa
Source: PubMed Central journal article supplement (PMC6434069; doi:10.1016/j.csbj.2019.03.004), 2019-03-06
Supplement: mmc1.pdf [file mmc1.pdf]

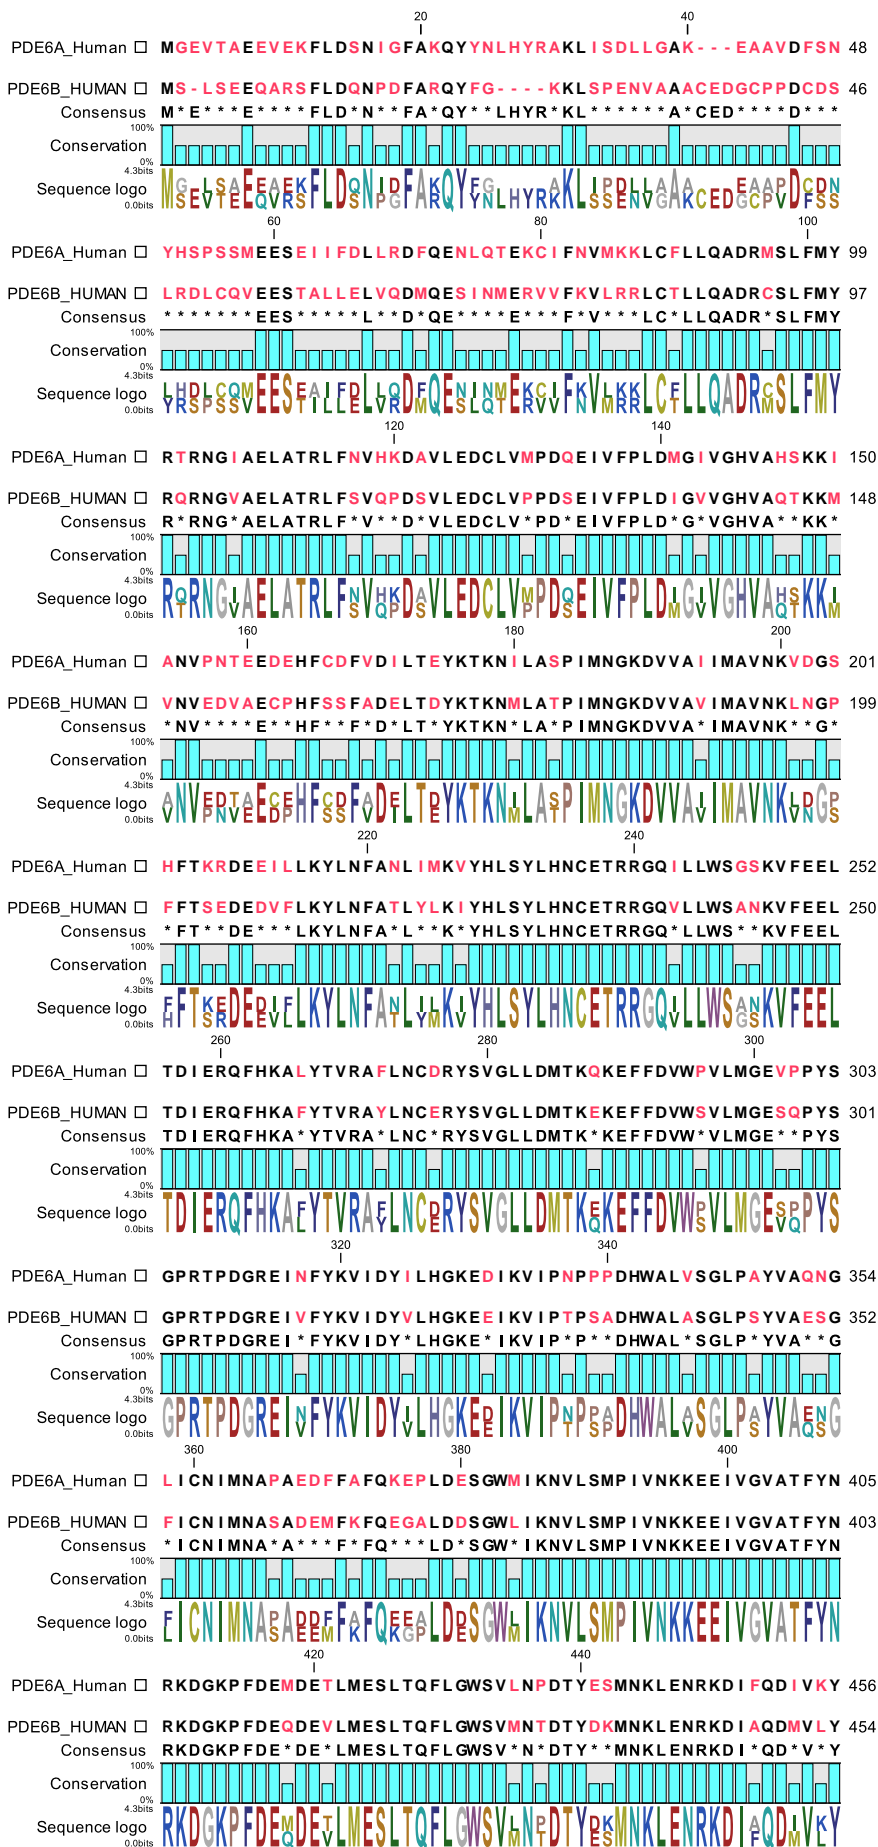

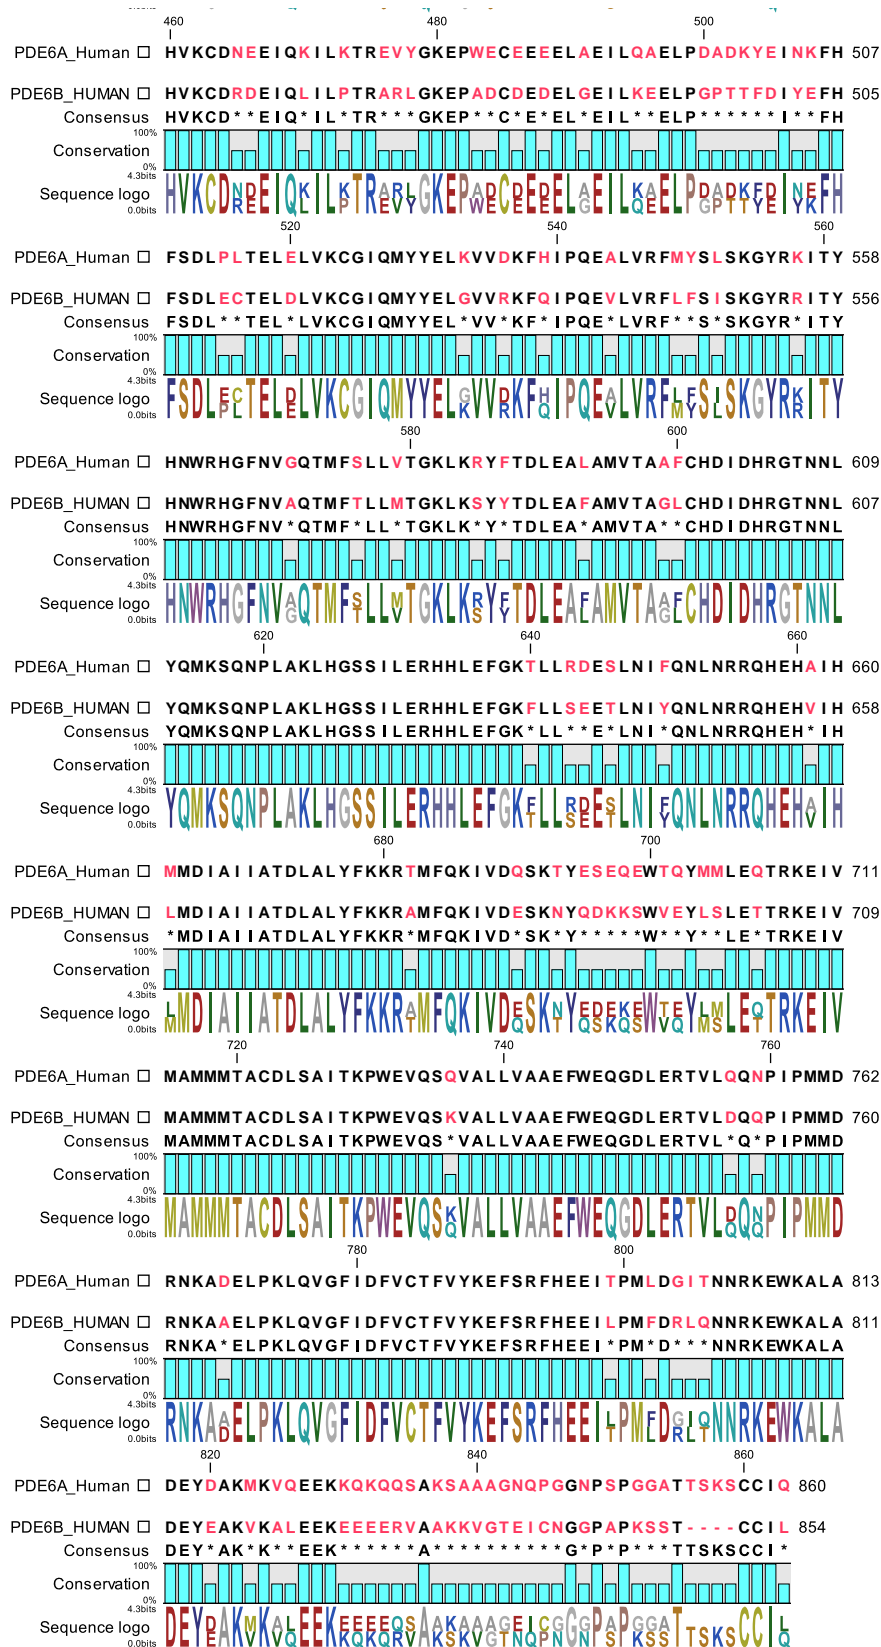

Supplementary Figure 1: Sequence alignment of Human PDE6 $\alpha$  and PDE6 $\beta$  chains using CLC workbench. Identical residues among both the chains are shown in black color while consensus residues, conservation bars plots (0-100) and sequence logos are also given at the bottom to highlight conservation in both the chain's amino acid sequence.



### Supplementary figure 3

**A**

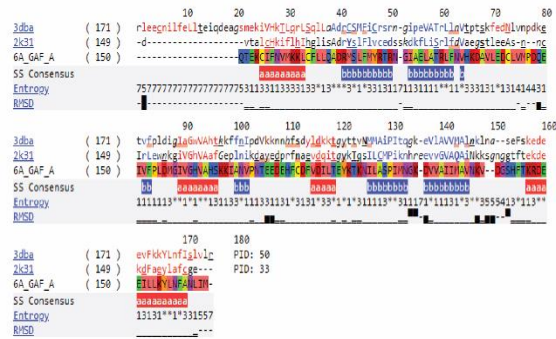

**B**

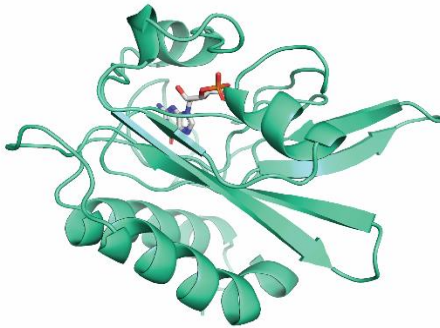

**C**

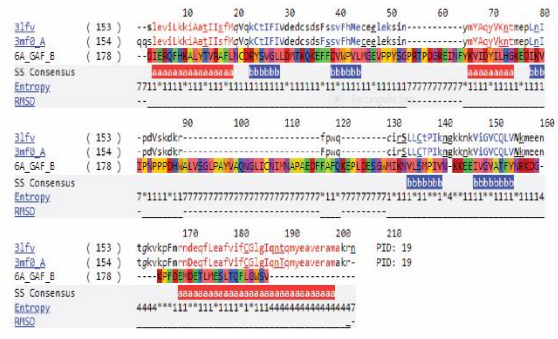

**D**

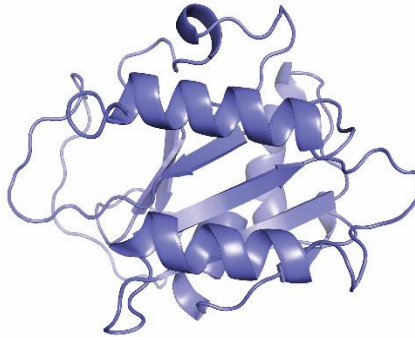

**E**

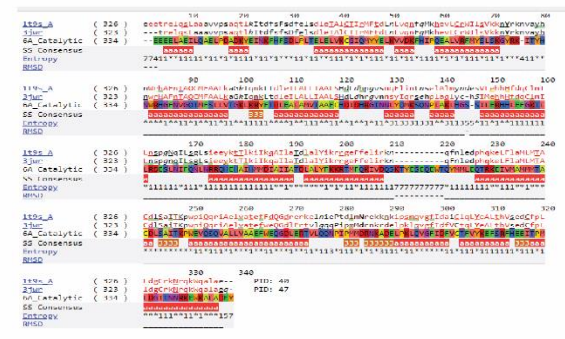

**F**

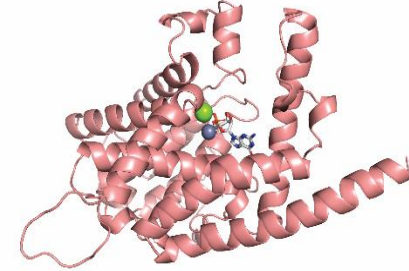

Supplementary Figure 3: Fugue Alignment and homology model of Gaf-A (A, B), Gaf-B (C, D) and catalytic domain (E, F) of PDE6 $\beta$  chain.

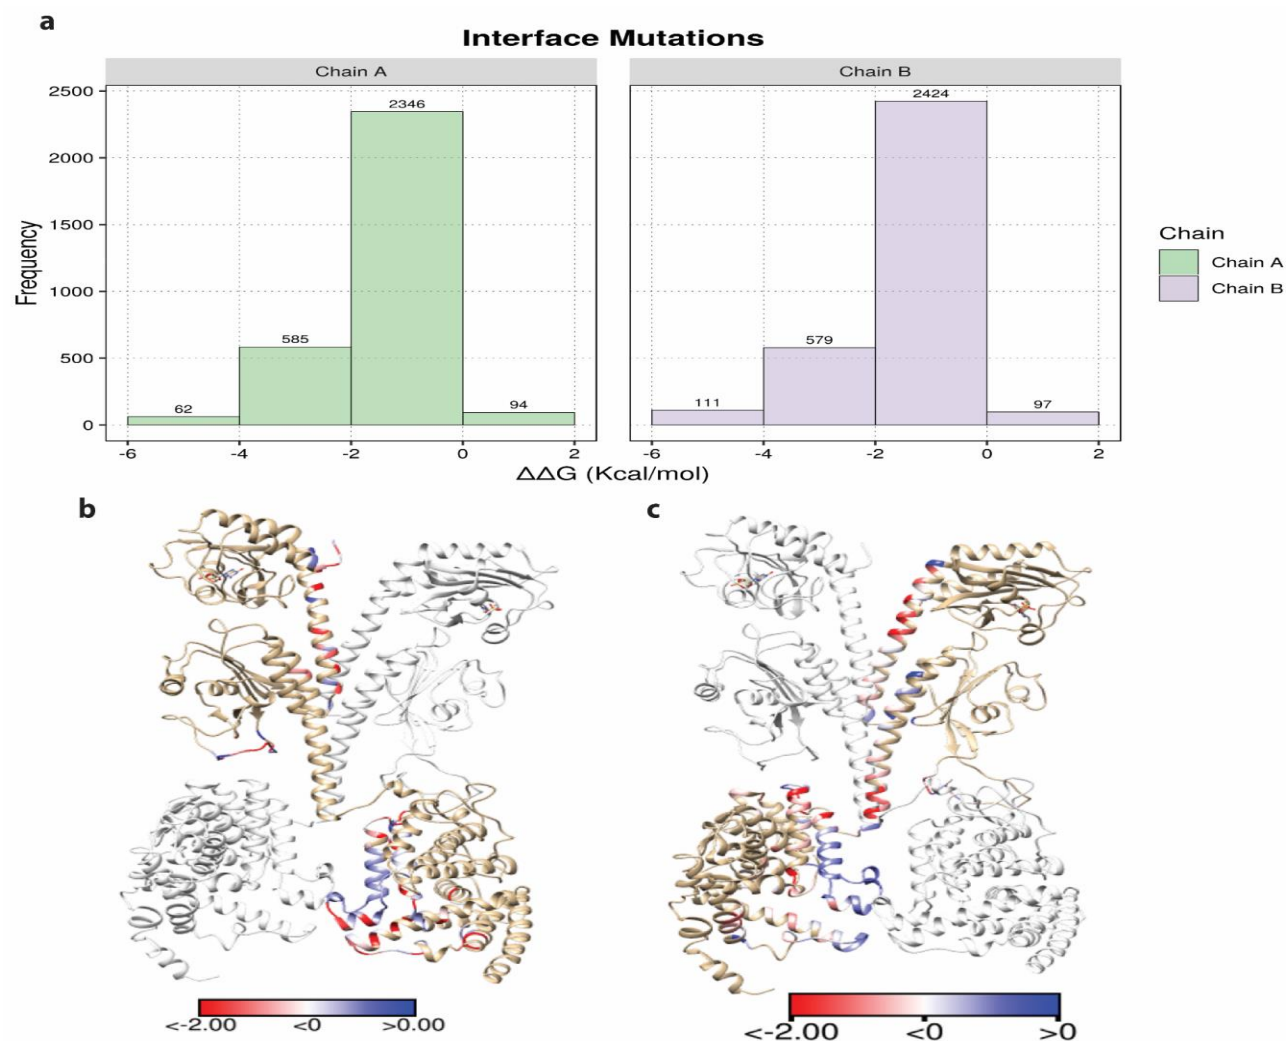

Supplementary Figure 4: a) Frequency distribution graphs illustrating the distribution of effects of saturation mutagenesis of dimeric interface residues of PDE6  $\alpha\beta$  in terms of  $\Delta\Delta G$  values predicted through mCSM-PPI b) Heatmap of the mCSM-PPI predicted changes upon mutation in residues present at heterodimeric interface of PDE6 $\alpha\beta$ . Energy changes calculated by mCSM-PPI are depicted as a colored gradient scale that starts from blue and turns white to red indicating the average effect from stabilizing ( $>0.00$  kcal/mol) shown in blue to slightly destabilizing ( $\geq -2.0$  kcal/mol) shown as white to highly destabilizing ( $<-2.00$  kcal/mol) as red.
